# Supplementary material for: Wuji Wan Formula Ameliorates Diarrhea and Disordered Colonic Motility in Post-inflammation Irritable Bowel Syndrome Rats by Modulating the Gut Microbiota
Source: PubMed Central journal article supplement (PMC5703868; doi:10.3389/fmicb.2017.02307), 2017-11-23
Supplement: Presentation_1.pdf [file Presentation_1.pdf]

# Supplementary information

## Supplementary results

Figure S1

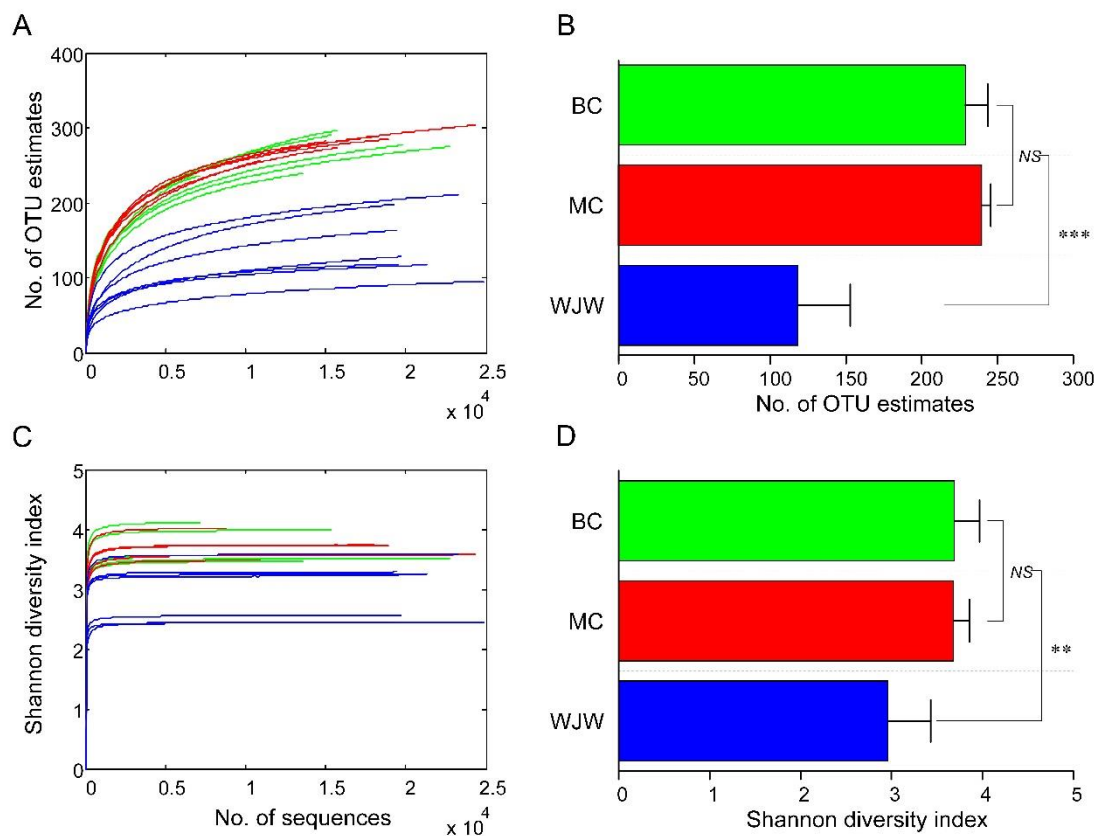

**Figure S1 Rarefaction and Shannon analysis of each sequencing sample. BC, blank control; MC, model control, WJW, Wuji Wan treatment. (A) and (C) show the Rarefaction curves and Shannon index curves of each sample, respectively; (B) and (D) show the Rarefaction OTU estimates and Shannon index of each group.**

Calculations were performed after rarefying an equal number (7140 reads) of sequence reads for all samples. Values are expressed as means  $\pm$  standard error.

Differences were assessed by one-way ANOVA/Turkey post hoc test and denoted as follows: \*  $P < 0.05$ ; \*\*  $P < 0.01$ ; \*\*\*  $P < 0.001$ ; NS not significant.

**Figure S2**

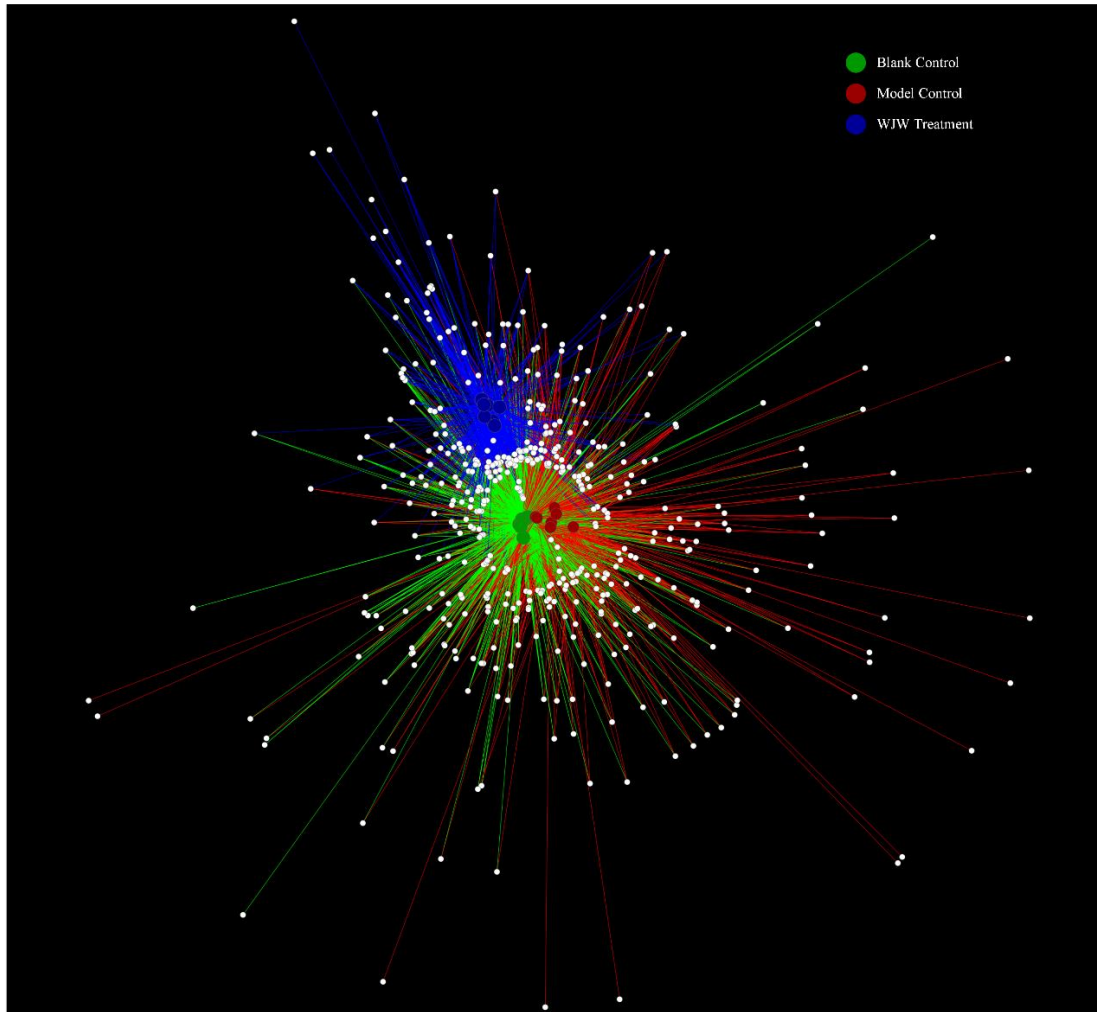

**Figure S2 Simplified cartoon illustration of possible host-gut microbe networks.**

Network diagrams are color-coded by type of treatment of the subjects.

**Figure S3**

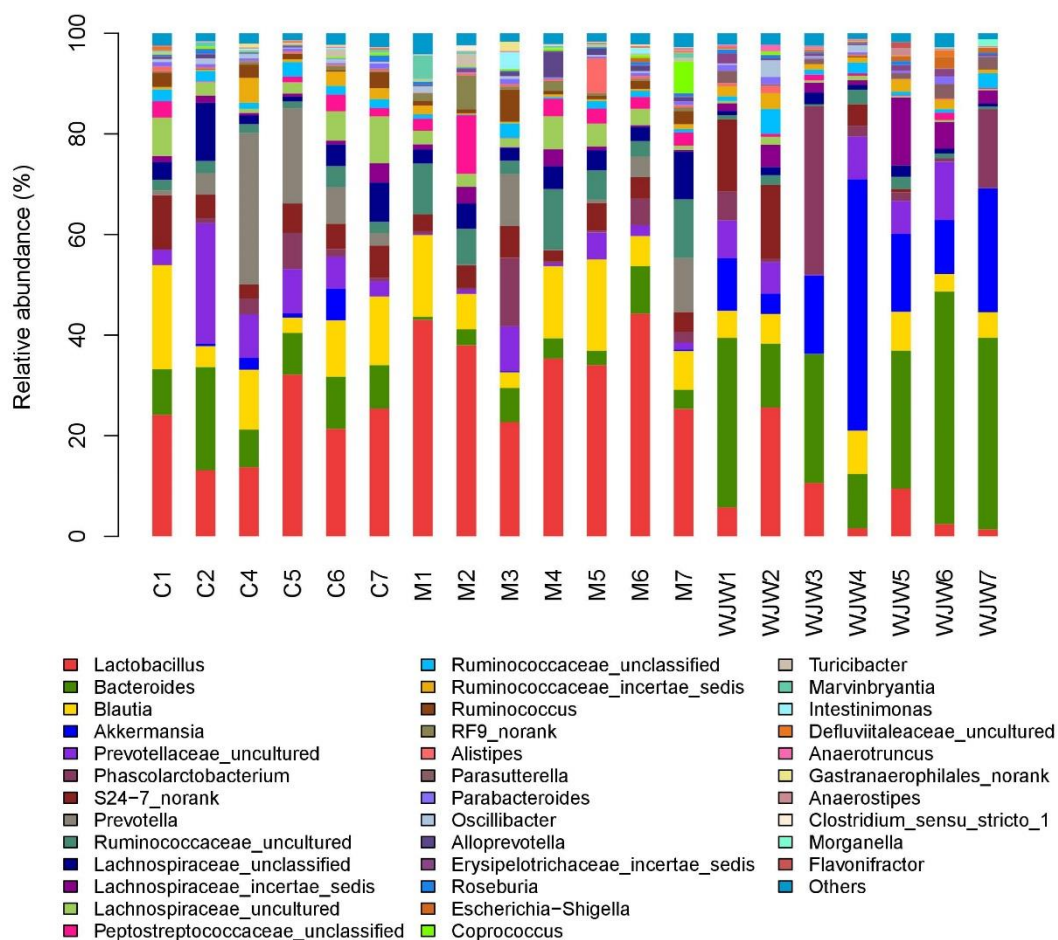

**Figure S3 Summary of the bacterial taxa present in the gut community of each mouse.** C1-7, blank control; M1-7, model control; WJW1-7, Wuji wan treatment. Each sample analyzed is indicated along the X-axis, the Y-axis indicates the relative abundance of each type (genus) of bacteria present in that gut community. A key to the bacteria taxa is listed at the bottom.



**Table S1**

Table S1 Significantly different phyla between groups as revealed by taxon-based comparisons.

| <b>Phylum</b>                 | <b>Blank control</b>     | <b>Model control</b>     | <b>WJW treatment</b>     | <b>P</b> | <b>FDR</b> |
|-------------------------------|--------------------------|--------------------------|--------------------------|----------|------------|
| <i>Actinobacteria</i>         | 0.05±0.06                | 0.27±0.22                | 0.16±0.15                | 0.078    | 0.111      |
| <i>Bacteroidetes</i>          | 37.75±13.41 <sup>a</sup> | 18.43±10.08 <sup>b</sup> | 39.66±13.74 <sup>a</sup> | 0.010    | 0.020      |
| <i>Candidate_division_TM7</i> | 0±0                      | 0.06±0.11                | 0±0                      | 0.223    | 0.272      |
| <i>Cyanobacteria</i>          | 0.23±0.31                | 0.31±0.69                | 0±0                      | 0.430    | 0.430      |
| <i>Deferribacteres</i>        | 0±0.01 <sup>a</sup>      | 0.03±0.03 <sup>b</sup>   | 0±0 <sup>a</sup>         | 0.006    | 0.015      |
| <i>Elusimicrobia</i>          | 0±0.01                   | 0.01±0.01                | 0±0                      | 0.245    | 0.272      |
| <i>Firmicutes</i>             | 59.37±13.33 <sup>a</sup> | 78.49±9.32 <sup>b</sup>  | 38.42±14.41 <sup>c</sup> | 0.000    | 0.000      |
| <i>Proteobacteria</i>         | 0.54±0.3 <sup>a</sup>    | 0.56±0.43 <sup>a</sup>   | 3.02±1.88 <sup>b</sup>   | 0.001    | 0.005      |
| <i>Tenericutes</i>            | 0.37±0.3                 | 1.75±2.24                | 0±0                      | 0.062    | 0.103      |
| <i>Verrucomicrobia</i>        | 1.67±2.43 <sup>a</sup>   | 0.08±0.12 <sup>a</sup>   | 18.73±15.17 <sup>b</sup> | 0.002    | 0.007      |

The results are expressed as the mean±SEM of 7 animals per group. Statistical comparisons were performed using one-way ANOVA and Tukey's post hoc range test for multiple comparisons at a significance level of P<0.05.
